# Supplementary material
Source: publisher site journal article supplement (https://www.dovepress.com/article/594053)
Supplement: Supplementary file 1 [file 594053%20Supplementary%20Figure%20S1.docx]

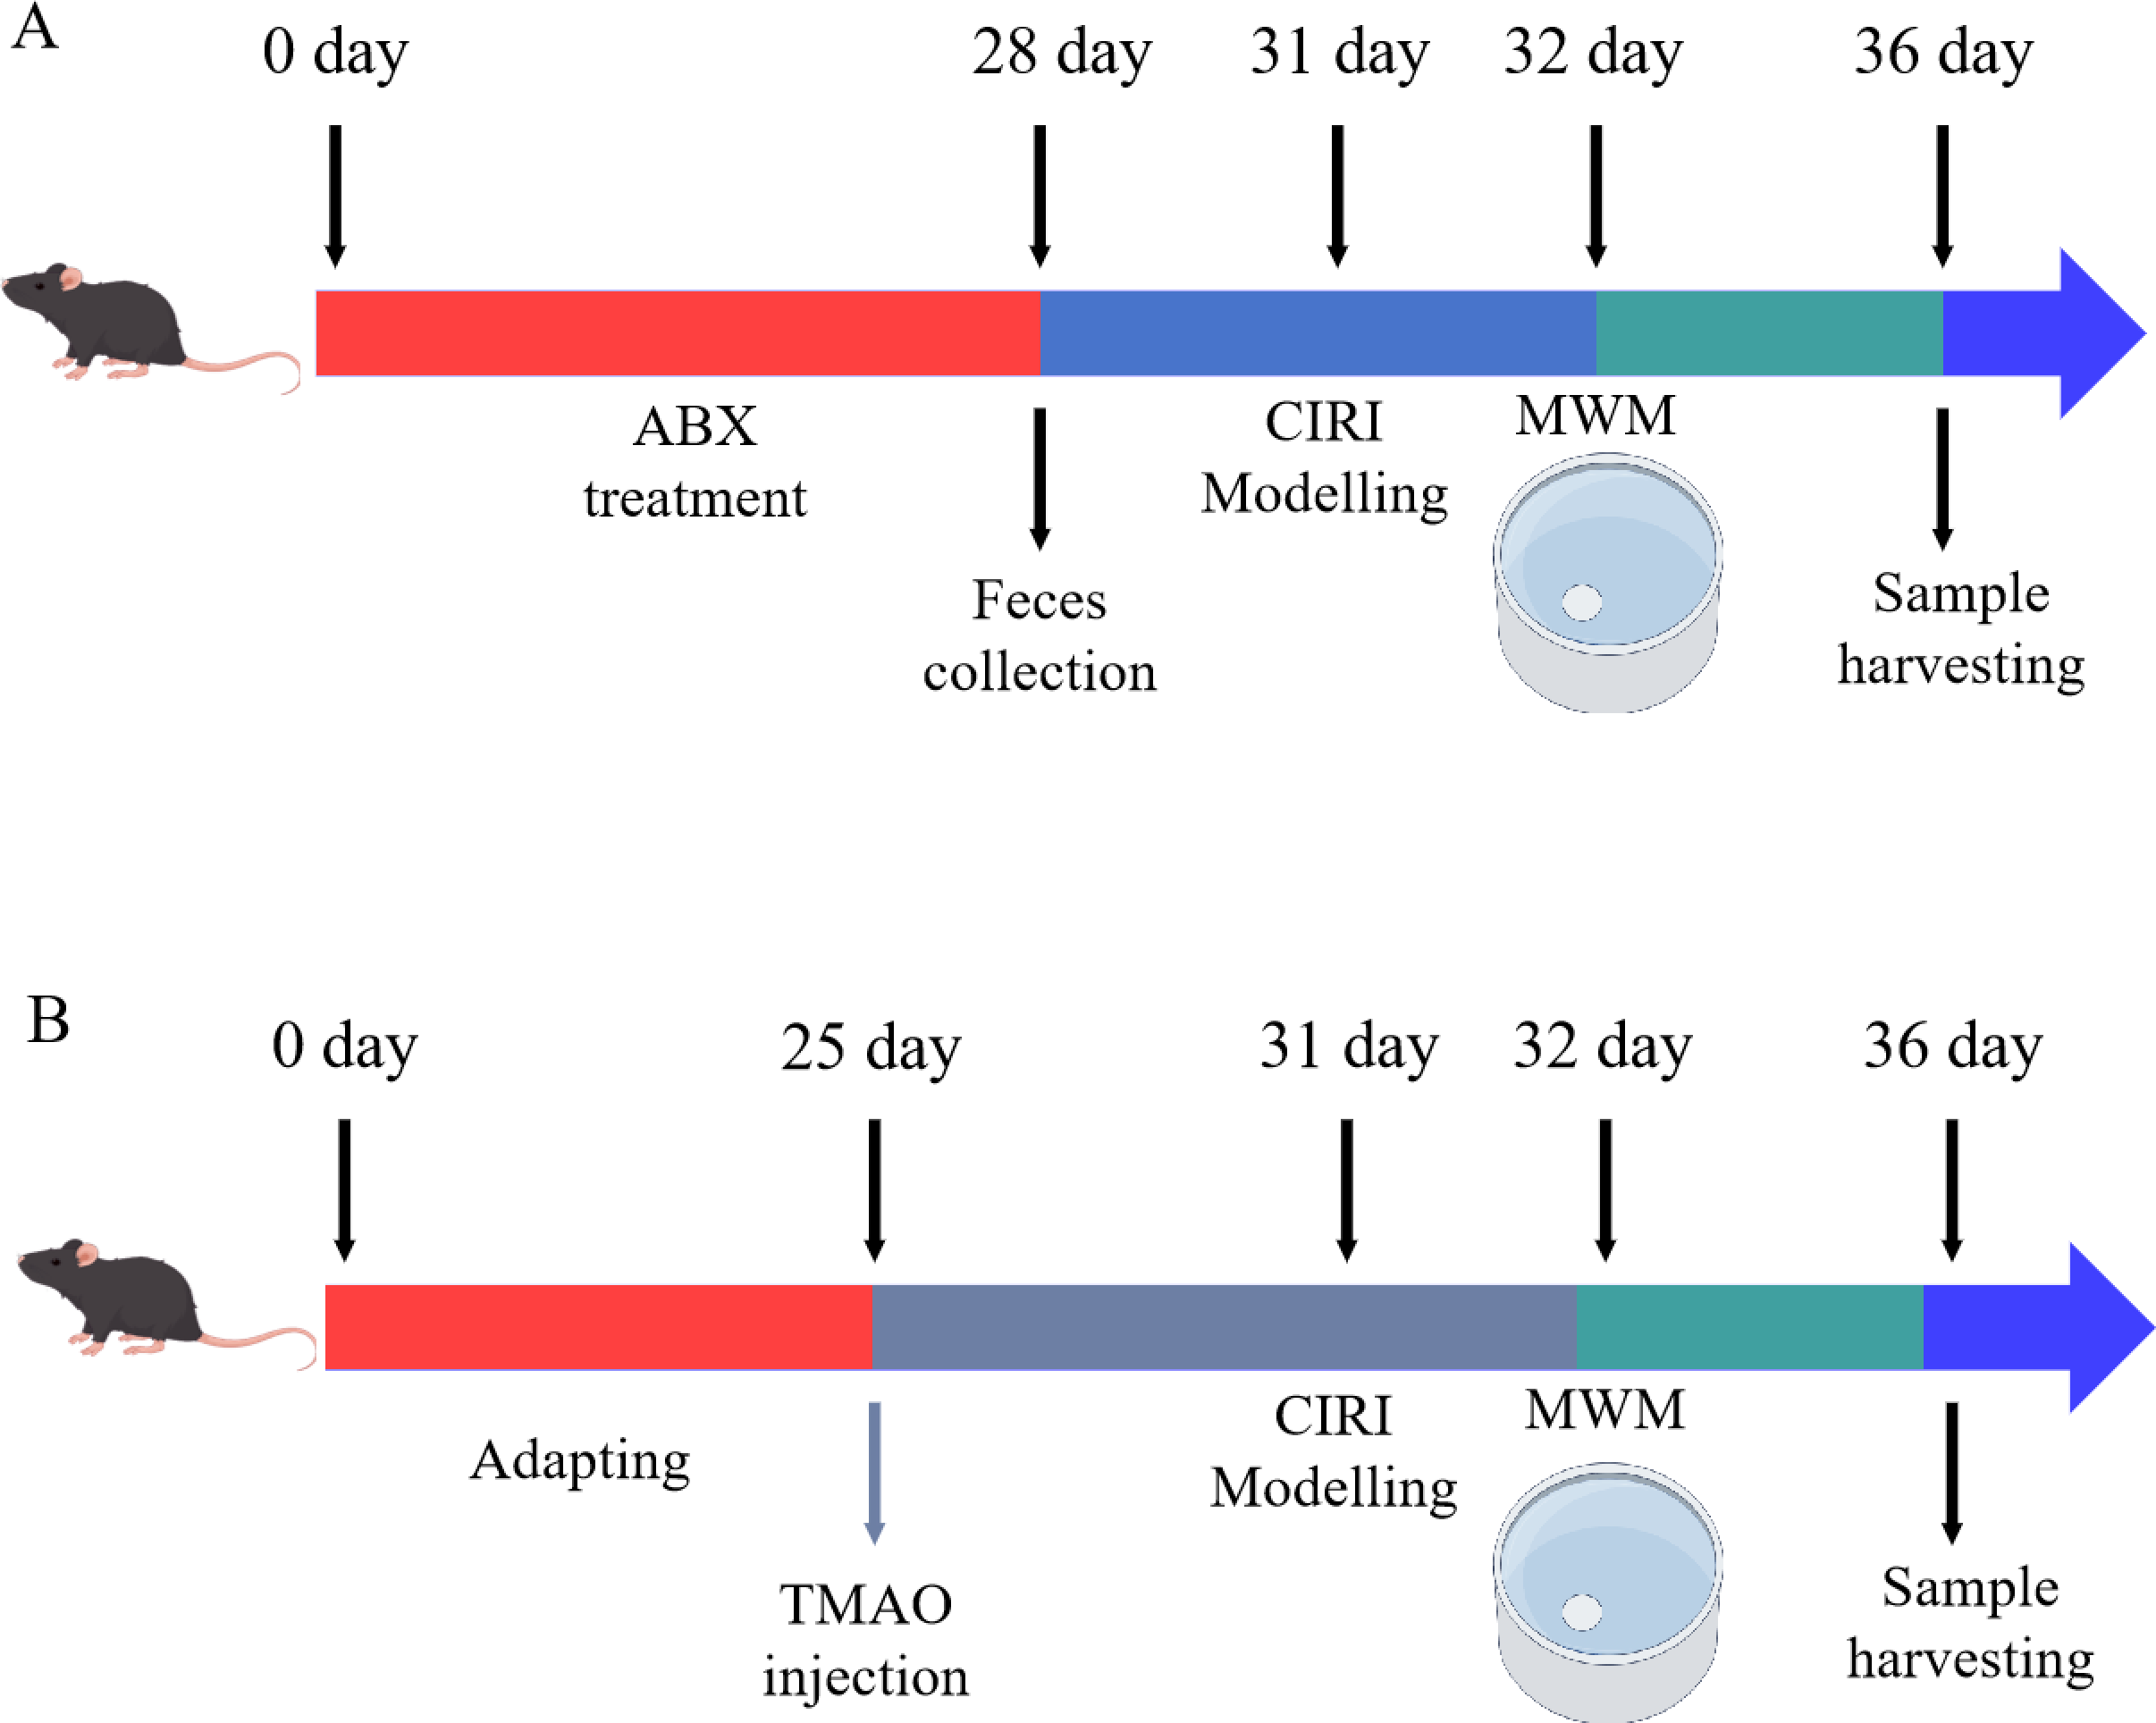


Supplementary Figure S1. Experimental workflow for the main and validation experiments. (A) Antibiotic treatment followed by CIRI modeling in the main cohort. (B) TMAO pretreatment followed by CIRI modeling in the validation cohort.
